# Supplementary material for: Facile synthesis of magnetic resorcinol–formaldehyde (RF) coated carbon nanotubes for methylene blue removal
Source: Royal Society of Chemistry journal article supplement (doi:10.1039/c5ra25738g), 2016-01-01
Supplement: c5ra25738g1.pdf [file c5ra25738g1.pdf]

## Facile Synthesis of Magnetic Resorcinol–Formaldehyde (RF) Coated Carbon Nanotubes for Methylene blue Removal

Dianqiu Zheng, Min Zhang\* †, Lei Ding, Yanwei Zhang, Jing Zheng†, Jingli Xu\*,†

College of Chemistry and Chemical Engineering, Shanghai University of Engineering Science, Shanghai 201620, China. E-mail: zhangmin@sues.edu.cn; xujingli@sues.edu.cn

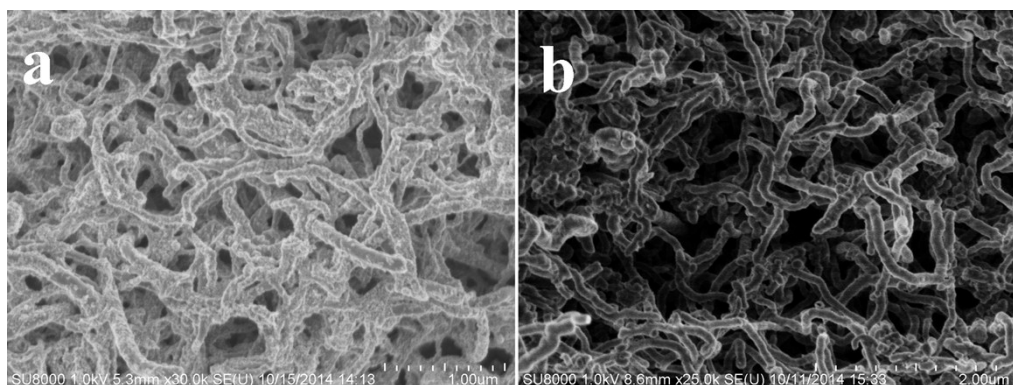

Fig. S1 The SEM images of (a) CNTs@Fe<sub>3</sub>O<sub>4</sub>, (b) CNTs@Fe<sub>3</sub>O<sub>4</sub>@RF

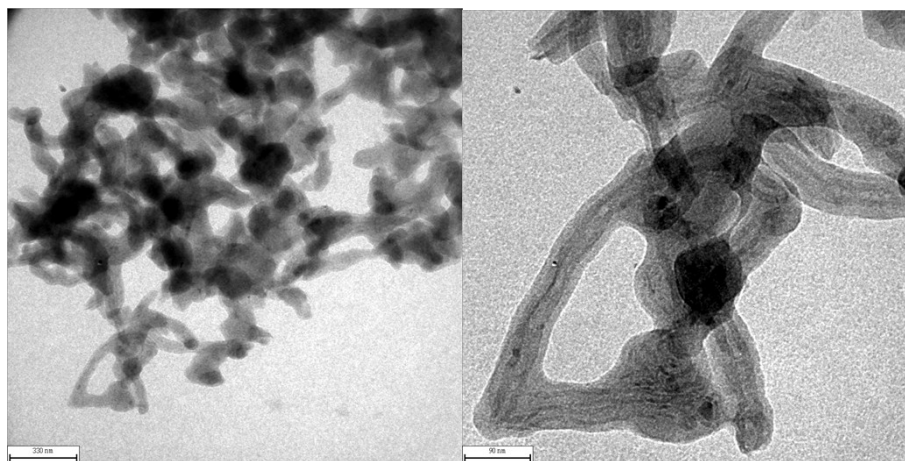

Fig. S2 The TEM images of CNTs@RF at different magnetification using the CNTs-OH as the template

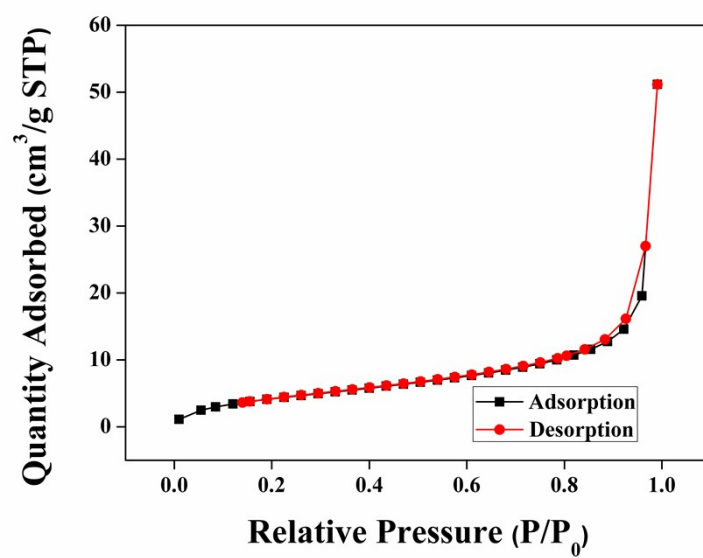

**Fig. S3** N<sub>2</sub> adsorption–desorption isotherms of CNTs@Fe<sub>3</sub>O<sub>4</sub>@ RF.
